# Supplementary material
Source: PubMed Central journal article supplement (PMC3837998)
Supplement: IAI.01033-13_zii999090420so2.pdf [file IAI.01033-13_zii999090420so2.pdf]

Figure S1

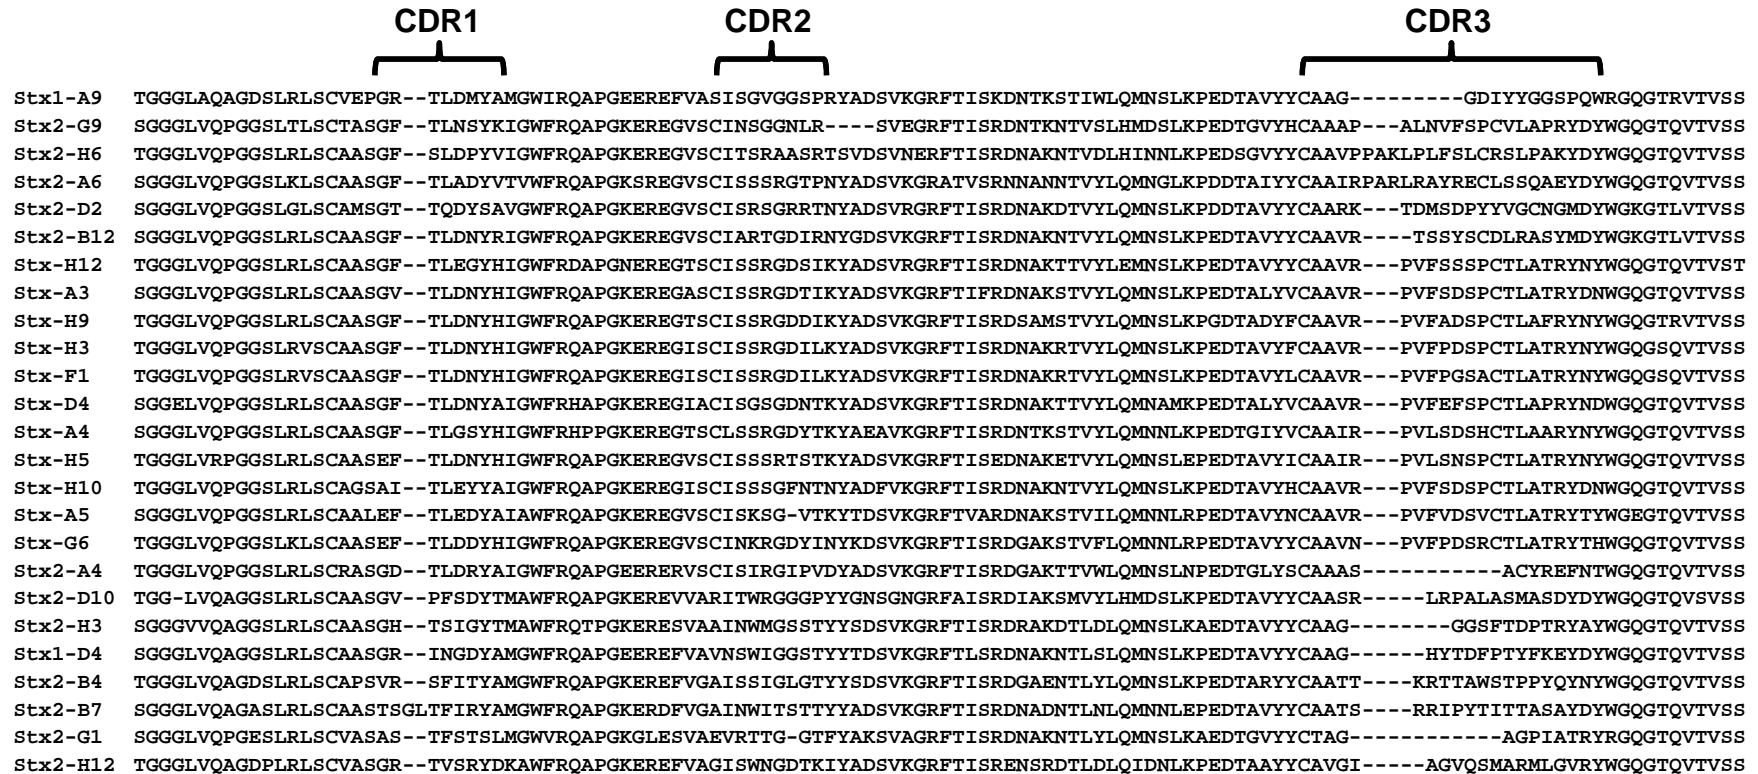

**Figure S1.** Amino acid sequences of VHHs selected for binding to Stx1 or Stx2. Sequences shown begin within framework 1 at the site of the primer binding employed in coding sequence DNA amplification from the immune alpaca cDNA [34] and continue through the end of framework 4. The parentheses at the end indicate whether the VHH contains a long hinge (lh) or a short hinge (sh). The three complementarity determining regions (CDRs) are indicated at the top.
