# Supplementary material
Source: PubMed Central journal article supplement (PMC3837998)
Supplement: IAI.01033-13_zii999090420so3.pdf [file IAI.01033-13_zii999090420so3.pdf]

Figure S2

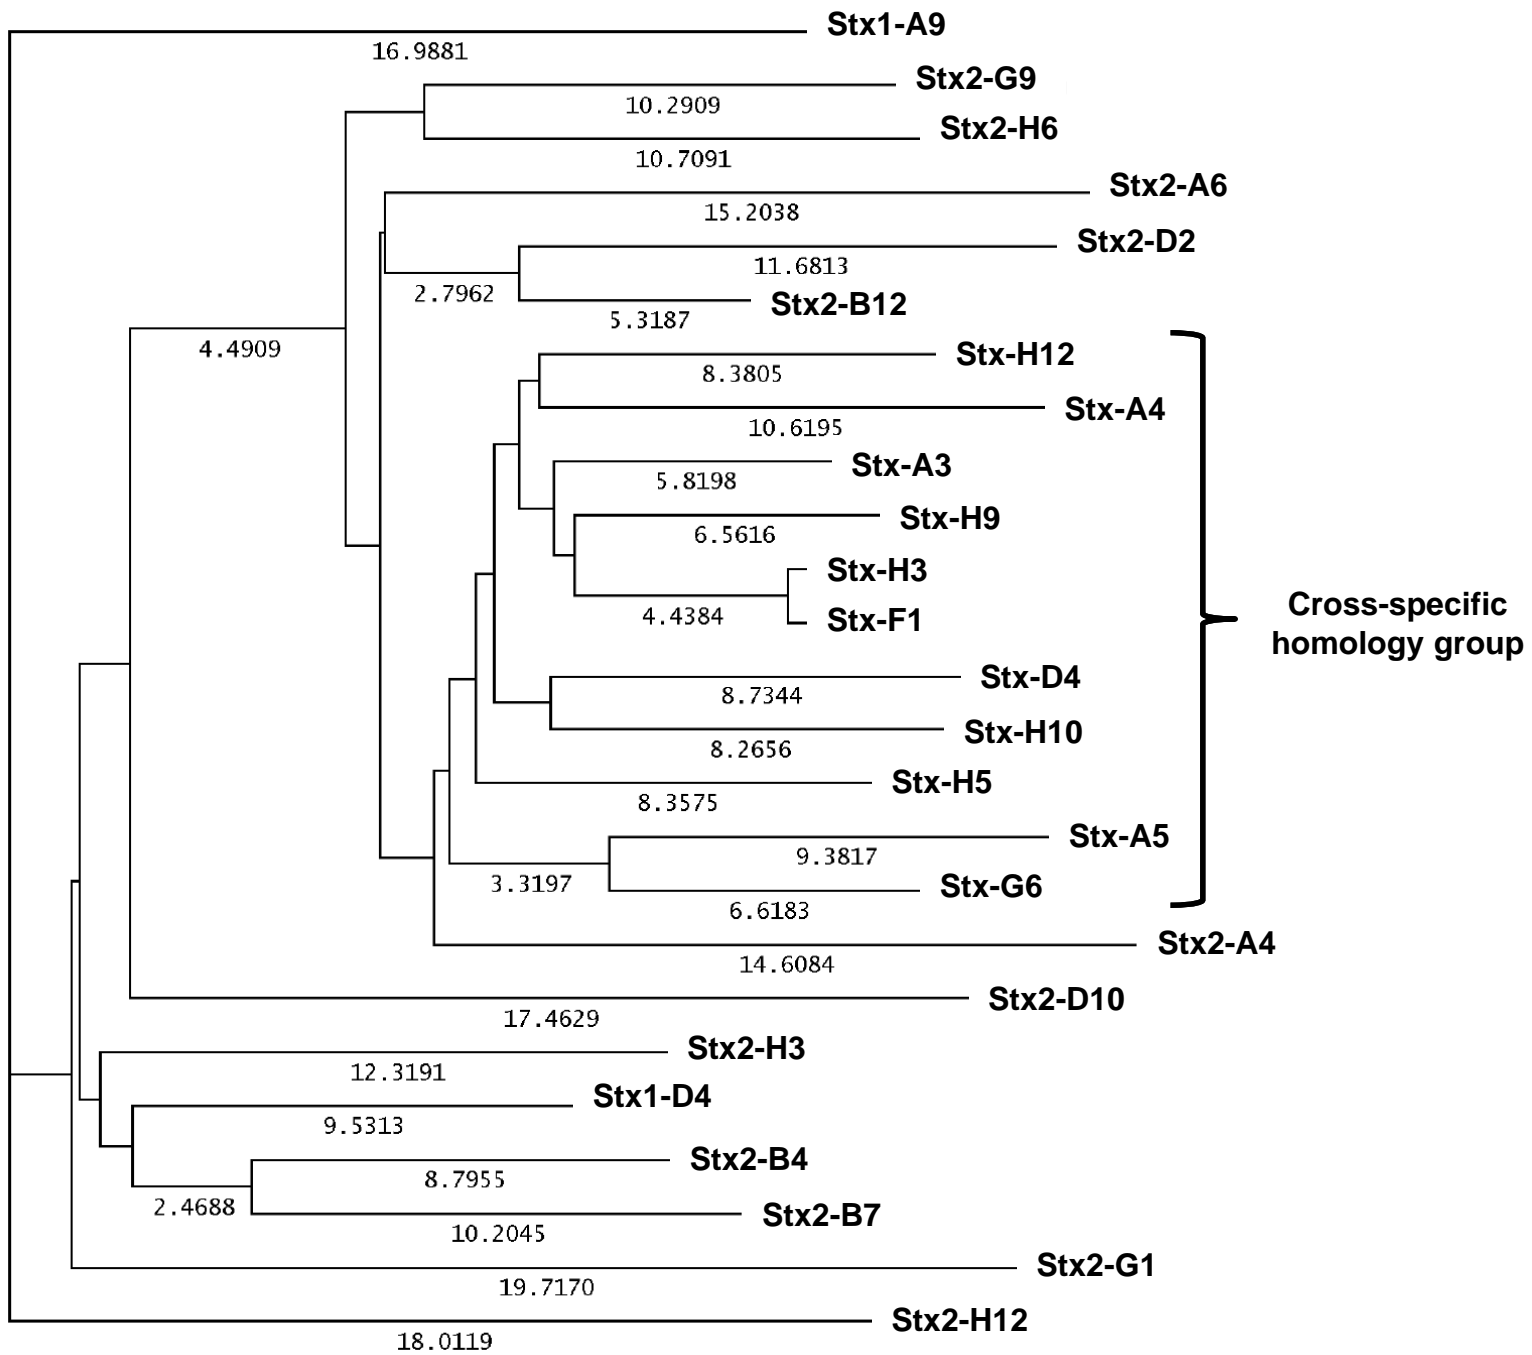

**Figure S2.** Dendrogram of VHs selected for binding to Stx1 or Stx2. The VHH sequences shown in Figure S1 were analyzed for homology to create a dendrogram. Longer branch lengths indicate less sequence homology. The central node labeled as the 'cross-specific homology group' indicate VHs that recognize both Stx1 and Stx2 and possess significant homology in CDR3 (see Figure S1).
